# Supplementary material for: Subject validation of reusable N95 stop-gap filtering facepiece respirators in COVID-19 pandemic
Source: PLoS One. 2020 Nov 13;15(11):e0242304. doi: 10.1371/journal.pone.0242304 (PMC7665821; doi:10.1371/journal.pone.0242304)
Supplement: S1 Dataset — (XLSX) [file pone.0242304.s002.xlsx]

## Sheet: Deidentified Dataset N95 SSM
Study Identification		Demographic Information									Bitrex tested 3M N95														APIL SSM															Feedback
Study ID	Date of Test (yyyy/mm/dd)	Age (Years)	Sex (M/F)	Height (cm)	Weight (kg)	BMI (kg/m^2)	Face Width (mm)	Face Length (mm)	NIOSH Panel	Naso-Menton Distance (mm)	3M Model	Negative Pressure Test	Run #1 Normal Breathing	Run #2 Deep Breathing	Run #3 Head Side-to-Side	Run #4 Head Up-and-Down	Run #5 Talking out loud	Run #6 Bending over	Run #7 Normal Breathing	Overall Harmonic Fit Factor (Run 1-7)	Stationary Harmonic Fit Factor (Run 1,2,7)	Dynamic Harmonic Fit Factor (Run 3-6)	Pass/Fail (1,0)	Retest Y/N (1,0)	Run #1 Normal Breathing	Run #2 Deep Breathing	Run #3 Head Side-to-Side	Run #4 Head Up-and-Down	Run #5 Talking out loud	Run #6 Bending over	Run #7 Normal Breathing	Overall Harmonic Fit Factor (Run 1-7)	Stationary Harmonic Fit Factor (Run 1,2,7)	Dynamic Harmonic Fit Factor (Run 3-6)	Pass/Fail (1,0)	Retest Y/N (1,0)	Mask Type	Mask Size	Filter Type	Comfort (0-5)	Ease of Breathing (0-5)
1	2020-05-06	40	M	180.4	100	30.7275	137	136	9	105	1860	Pass	198.48	177.71	136.25	97.55	47.43	113.09	145.04	107.565	170.842	84.1807	0	0	4172.07	27935.9	27504.8	14617.1	1541.47	14863	5013.72	5402.4	6316.61	4873.4	1	0	SSM-D20	M	AirGuard	3	4
4	2020-05-07	35	F	157.5	47.7	19.229	144	110	4	85	1870+	Pass	8.13	5.19	7.92	9.27	21.53	6.9	9.73	8.29417	7.16924	9.40044	0	0	8590.05	11560.9	50606.6	4880.49	6017.73	27551.8	1e+08	11110.2	14784	9364.86	1	1	SSM-D20	M	AirGuard	3.5	4
5	2020-05-22	66	M	175	69	22.5306	141	119	7	100	1870+	Pass	1929	1248	1449	119	1331	298	3007	983	1815.71	303.019	1	1	2380.53	3725.67	3238.58	3548.77	1127.64	4882.48	3428.3	2629.25	3060.69	2377.86	1	0	SSM-D20	M	AirGuard	3	5
7	2020-05-07	70	M	167	72.7	26.0676	132	118	3	10.5	1870+	Pass	33.22	97.88	87.16	38.73	30.55	13.51	19.74	29.79	32.9752	27.769	0	0	44311.8	1e+08	1e+08	4500.29	7248.16	1e+08	1e+08	18287.2	132818	11105.1	1	0	SSM-D20	M	AirGuard	3	3
8	2020-05-07	32	F	167	64	22.9481	117	114	NA	95	1870+	Pass	2368.05	346.23	1054.18	581.28	640.39	784.89	367.45	606.767	497.347	726.67	1	0	1e+08	21063.4	16710.1	7149.92	3460.6	19645.2	41004.3	11448.2	41740.1	7413.23	1	0	SSM-D20	M	AirGuard	2	4
9	2020-05-07	34	M	180	72.7	22.4383	129	129	6	105	1860	Pass	487.2	429.76	715.84	721.4	235.53	510.38	542.23	460.167	482.031	445.027	1	0	63515.2	1e+08	117942	99999999	6439.1	1e+08	114393	37175.5	122469	24420	1	0	SSM-D20	M	AirGuard	4	5
11	2020-05-08	32	M	182	90	27.1706	148	135	10	120	1860	Pass	98.81	77.56	27.87	53.15	66.83	30.52	40.53	46.6321	62.9105	39.0532	0	0	1454	304	125	430	1297	911	1172	411.166	621.057	328.022	1	0	SSM-D20	M	AirGuard	4	4
12	2020-05-08	35	M	170	62	21.4533	126	120	6	104	1860	Pass	162	304	379	623	71.5	141	275	182.194	229.031	157.966	1	0	43783	45135	18215	6454	2039	7391	48154	77884	45618.8	4787.1	1	0	SSM-D20	M	AirGuard	4	4
13	2020-05-08	31	F	163	58	21.83	121	115	3	100	1870+	Pass	1877	3064	1380	1335	574	810	2292	1218.27	2315.82	898.79	1	0	25913	10208	30872	15709	1199	53426	1e+08	6451	21967.9	4215.87	1	0	SSM-D20	M	AirGuard	3	4
14	2020-05-09	29	F	164	54	20.0773	115	114	NA	90	1870+	Pass	1395	409	665	696	611	372	526	567.797	592.537	550.557	1	0	49093	10763	7802	2499	1091	68742	24053	4337	19372.9	2740.72	1	0	SSM-D20	M	AirGuard	3	5
15	2020-05-10	33	M	178	74	23.3556	132	130	6	105	8210	Pass	777.56	369.77	490.08	234.05	367.66	443.08	692.2	418.534	551.965	354.299	1	0	2508.4	3460.08	2467.79	4767.99	2598.7	3244.5	1497.24	2628.08	2213.1	3058.16	1	0	SSM-D20	M	AirGuard	4	5
18	2020-05-11	55	F	163	67.7	25.4808	116	110	NA	90	1860S	Pass	134	48	132	139	43	70.19	138	79.9	84.4062	76.5215	0	1	6302.81	4167.24	3221.63	4757.16	619.18	2008.13	15225.4	2259.58	6461.25	1518.82	1	0	SSM-D20	M	AirGuard	3	4
17	2020-05-11	46	M	178	75	23.6713	133	126	6	105	1870+	Pass	161.69	134.29	184.13	84.57	233.69	138.67	270.25	151.918	173.095	139.15	1	0	27741.1	2729.55	6124.81	26406	2885.47	7134.07	1e+08	6420.29	7454.93	5814.99	1	0	SSM-D20	M	AirGuard	4	4
20	2020-05-11	29	F	167	58	20.7967	116	110	NA	97.5	1870+	Pass	48.58	74.1	41.21	40.9	25.78	39.85	52.25	42.22	56.3712	35.5241	0	1	22803.8	51519.1	1e+08	4387.1	1934.46	1e+08	85100.7	8537.48	39992.8	5369.84	1	0	SSM-D20	M	AirGuard	2	3
21	2020-05-13	37	M	178	72.7	22.9453	126	115	3	95	8210	Pass	432.84	321.21	238.19	155.21	183.96	120.35	180.16	197.96	273.369	164.027	1	0	49760.8	999.99	15234.8	44310.6	659.05	6057.76	1e+08	2508.02	2940.84	2259.1	1	0	SSM-D20	M	AirGuard	3	5
22	2020-05-13	34	F	168	54	19.1327	112	120	NA	100	1860	Pass	231.8	58.85	242.73	126.41	73	28	179	79	111.553	65.1005	0	0	1990.6	1322.21	1043.29	1479.68	859.36	2365.5	6281.92	1509.08	2115.87	1241.96	1	0	SSM-D20	M	AirGuard	3	2
23	2020-05-14	40	M	169	53	18.5568	132	118	3	92	1870+	Pass	980.47	441.23	750.38	576.82	350.82	643.04	829.86	585.06	667.953	535.341	1	0	44216.9	43703.4	78311.8	64417.1	1885.82	42290.2	1e+08	11167.6	65923.5	6870.34	1	0	SSM-D20	M	AirGuard	4	4
24	2020-05-14	36	M	178	83	26.1962	135	124	7	115	8210	Pass	269.68	120.25	149.17	131.27	97.77	179.59	365.92	155.99	203.294	132.811	1	0	28368.3	7914.87	14597.2	5531.33	2414.89	15527.2	46180.5	7683.5	16371.1	5496.05	1	1	SSM-D20	M	AirGuard	2	3
25	2020-05-14	36	M	190	110	30.4709	139	117	4	95	1860	Pass	174.85	93.82	187.36	127.94	112.95	134.34	220.89	139.01	143.506	135.82	1	0	153413	134286	1e+08	1436.53	4865.83	17314.1	31200.8	6962.28	65195.2	4169.26	1	0	SSM-D20	M	AirGuard	4.5	5
26	2020-05-14	31	F	168	53	18.7783	123	115	3	90	1860S	Pass	124	108	116	131	154	70	167	116	128.69	108.01	1	1	137.97	436.38	160.78	218.4	90.87	285.68	431.29	188.366	252.99	158.08	1	1	SSM-D20	M	AirGuard	3	3
16	2020-05-26	33	M	186	85	24.5693	135	127	7	102	1870+	Pass	2028.9	929.43	354.47	641.96	498.59	643.03	1503.23	688.05	1342.86	503.801	1	1	1e+08	25005.2	57789	17914.8	1936.41	61832.8	1e+08	10840.5	74978	6603.75	1	0	SSM-D20	M	AirGuard	4	4
27	2020-05-18	30	M	174	80	26.4236	147	129	10	100	1860	Pass	157.4	99.7	95.7	112.5	88.4	71.1	130.7	101.8	124.821	89.4552	0	0	17785	7471	7392	12133	1464	27121	18494	5923	12287.5	4266.06	1	0	SSM-D20	M	AirGuard	4	4
32	2020-05-21	36	M	183	76	22.694	143	130	9	120	1870+	Pass	167.5	96.1	134	160.5	128.9	109.7	162.5	131.8	133.157	130.86	1	0	8209	70152	10602	92753	3099	99999999	99999999	12414	22045.5	9350.21	1	0	SSM-D20	M	AirGuard	3.5	4
28	2020-05-21	43	F	161	52	20.061	124	111	3	100	1860S	Pass	156	87.9	142.5	150.7	138.5	105	332	136.7	144.239	131.591	1	0	6833	7480.1	4661.8	2345	8157	14181	79249	6213	10251	4795.82	1	0	SSM-D20	M	AirGuard	4	4
36	2020-05-21	35	F	163	54	20.3244	126	110	3	90	1860S	Pass	34.7	31.5	35.5	62.3	25.4	7	42.2	23	35.6036	17.6641	0	0	6572	2532	62939	68726	5185	54260	20560	8358	5035.72	16547.2	1	0	SSM-D20	M	AirGuard	3	3
34	2020-05-21	40	F	171	89	30.4367	137	111	4	96	1870+	Pass	619.5	557	584	424	156	234	309	327	451.414	271.102	1	1	47177	8592	5386	2224	1346	3268	25600	3761.63	16983.1	2374.95	1	0	SSM-D20	M	AirGuard	5	3
10	2020-05-21	36	M	185	79.5	23.2286	121	119	6	105	8210	Pass	108.4	111.8	148.25	128.06	164.1	114.2	199.2	133.1	129.368	136.033	1	1	169950	171988	90670.1	4010.92	18129.1	59878.1	25995.3	18306.6	59800.3	12040.6	1	0	SSM-D20	M	AirGuard	4	4
29	2020-05-21	35	M	179	79	24.6559	145	122	7	108	1860	Pass	52.94	99.5	111	103	81	79	112.5	86	79.3054	91.4878	0	0	1315	1952	1633	1542	1027	2314	12001	1740	2212.26	1499.96	1	1	SSM-D20	M	AirGuard	4	4.5
37	2020-05-22	55	F	165	95	34.8944	124	125	6	99	1870+	Pass	443	467	531	496	167	155	407	302	437.594	244.813	1	0	91266	49532	16370	14504	7289	47485	46675	20537	57066	13875.1	1	0	SSM-D20	M	AirGuard	3	3
38	2020-05-22	42	F	158	59	23.634	135	124	7	90	1870+	Pass	930	839	640	117	104	249	421	247	646.209	168.485	1	0	16979	99999999	55203	18595	1642	3558	15160	6439	24025.1	4158.16	1	0	SSM-D20	M	AirGuard	2	4
31	2020-05-22	30	F	167	70	25.0995	140	119	7	89	1860S	Pass	236	125	120	112.5	49	125.7	197	112	173.276	87.7466	1	0	9466.3	41248.1	99999999	98897	2874	99999999	57614	13852	20375.1	11170.7	1	0	SSM-D20	M	AirGuard	2	4
39	2020-05-22	56	F	152	49	21.2084	134	108	1	93	1860S	Pass	36.1	25.4	26.6	25	25.7	28.4	20.1	26.1	25.6801	26.3651	0	0	9197	14330	11103	222.5	127.7	751	6229.4	497	8848.41	290.976	1	0	SSM-D20	M	AirGuard	4	5
41	2020-05-22	41	M	196	82	21.3453	140	133	9	120	1860	Pass	143	75	121	62	50	63	77	75	90.054	66.3719	0	0	25092	5816	32156	193	1299	7119	32912	1101	12387.6	653.303	1	0	SSM-D20	M	AirGuard	5	5
40	2020-05-22	43	F	153	60	25.6312	140	109	2	96	1870+	Pass	690	315	298	428	253	180	191	279	304.276	263.153	1	0	68716	38126	22160	10318	3658	29782	28922	13351	39810.4	8908.78	1	0	SSM-D20	M	AirGuard	3	4
42	2020-05-23	42	M	187	73	20.8756	125	129	2	115	1870+	Pass	112	149	166	228	95.8	96	193	134	144.083	127.938	0	0	49688	7827	14828	5109	758	32373	21718	3874	15469.2	2479.35	1	0	SSM-D20	M	AirGuard	3	4
43	2020-05-23	37	M	165	70	25.7117	143	125	7	108	1860	Pass	621	344	649	370	40	201	249	164	351.562	116.895	1	0	20924	9405	25740	23459	593	9067	19691	3358	14641.1	2129.8	1	0	SSM-D20	M	AirGuard	5	5
44	2020-05-23	47	F	163	49	18.4425	134	105	1	100	1870+	Pass	496	407	379	134	192	108	259	213	359.965	162.808	1	0	14539	7330	99999999	2823	2204	12554	11202	5922	10187.6	4506.44	1	0	SSM-D20	M	AirGUard	5	3
45	2020-05-23	29	F	178	68	21.4619	144	115	5	92	1870+	Pass	425	240	254	143	210	136	273	210	294.62	173.574	1	0	23495	8983	10887	12034	1299	8633	10800	5355	12171.6	3771.42	1	0	SSM-D20	M	AirGuard	3	4
46	2020-05-23	28	F	157	47	19.0677	148	108	5	101	1870+	Pass	67	68	70	40	84	53	77	62	70.3923	57.0952	0	0	13205	99999999	8566	16683	2905	7568	99999999	9609	39604.5	6125.09	1	0	SSM-D20	M	AirGuard	5	5
47	2020-05-23	29	F	153	52	22.2137	135	127	7	101	1860S	Pass	147	103	151	122.5	103	76	139	114	126.552	106.235	1	0	883	1524	960	1906	572	1049	1247	1021	1158.03	937.236	1	0	SSM-D20	M	AirGuard	4	5
